Correction

# Correction: Acute High Fat Diet Consumption Activates the Mesolimbic Circuit and Requires Orexin Signaling in a Mouse Model

The PLOS ONE Staff

The image quality for panel A in Figure 2 and Figure 3 is poor in the published article.

For a better quality version of Figure 2A, see here:

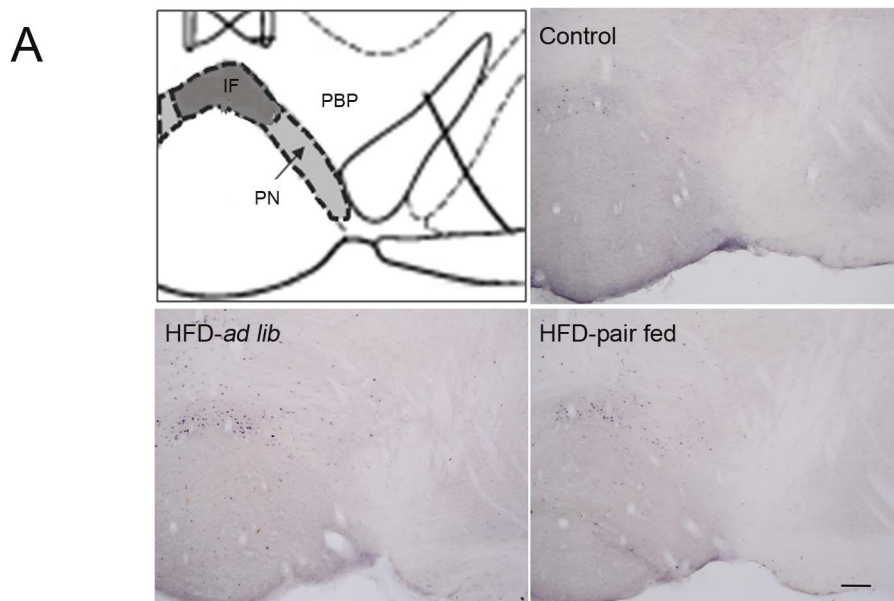

**Figure 2. Acute HFD activates c-Fos in specific sub-regions of the VTA.** Panel A shows a schematic diagram of VTA sub-regions in a coronal section of the mouse brain (upper left) and representative microphotographs of c-Fos (black/purple signal) immuno-staining in the VTA of control (upper right), HFD-ad lib (bottom left) and HFD-pair-fed (bottom right) groups. Scale bar: 100  $\mu$ m.  
doi:10.1371/journal.pone.0087478.g002

**Citation:** The PLOS ONE Staff (2014) Correction: Acute High Fat Diet Consumption Activates the Mesolimbic Circuit and Requires Orexin Signaling in a Mouse Model. PLoS ONE 9(3): e92932. doi:10.1371/journal.pone.0092932

**Published:** March 14, 2014

**Copyright:** © 2014 The PLOS ONE Staff. This is an open-access article distributed under the terms of the Creative Commons Attribution License, which permits unrestricted use, distribution, and reproduction in any medium, provided the original author and source are credited.

For a better quality version of Figure 3A, see here:

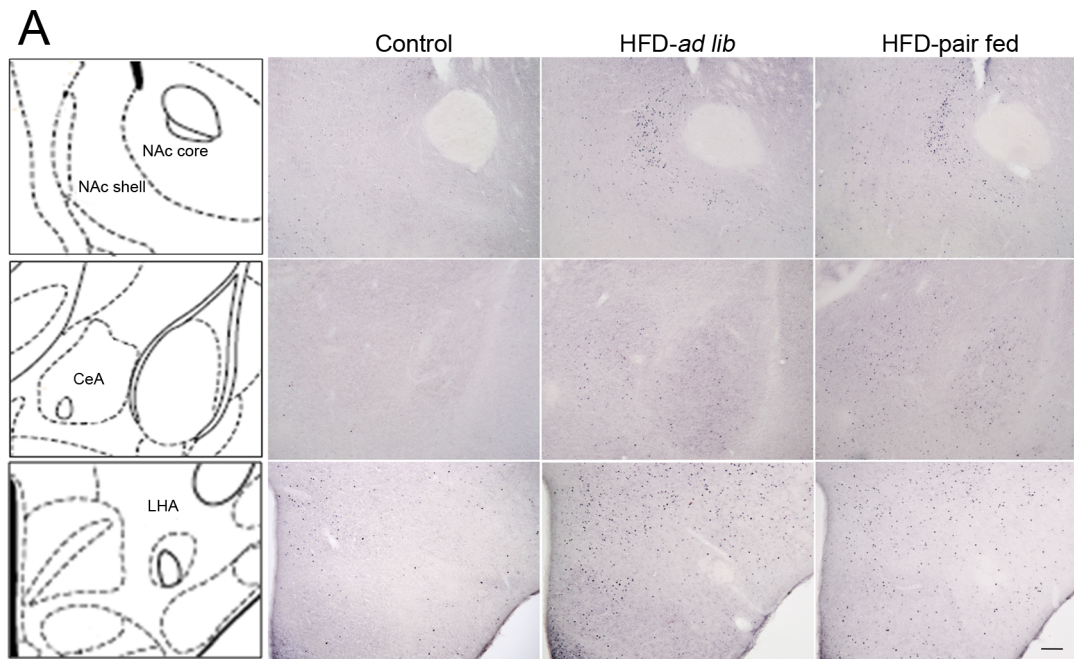

**Figure 3. Acute HFD activates c-Fos in specific nucleus of mesolimbic pathway.** Panel **A** shows a schematic diagram of the brain regions under study in a coronal section of the mouse brain (left column) and representative microphotographs of c-Fos immuno-staining of control, HFD-*ad lib* and HFD-pair-fed groups. Upper, middle and bottom line of images show the NAc (core and shell), the CeA and the LHA, respectively. Scale bar: 100  $\mu$ m.

doi:10.1371/journal.pone.0087478.g003

## Reference

1. Valdivia S, Patrone A, Reynaldo M, Perello M (2014) Acute High Fat Diet Consumption Activates the Mesolimbic Circuit and Requires Orexin Signaling in a Mouse Model. PLoS ONE 9(1): e87478. doi:10.1371/journal.pone.0087478
